# Supplementary material
Source: PubMed Central journal article supplement (PMC5517314)
Supplement: NIHMS876837-supplement-Figure_S1.pdf [file NIHMS876837-supplement-Figure_S1.pdf]

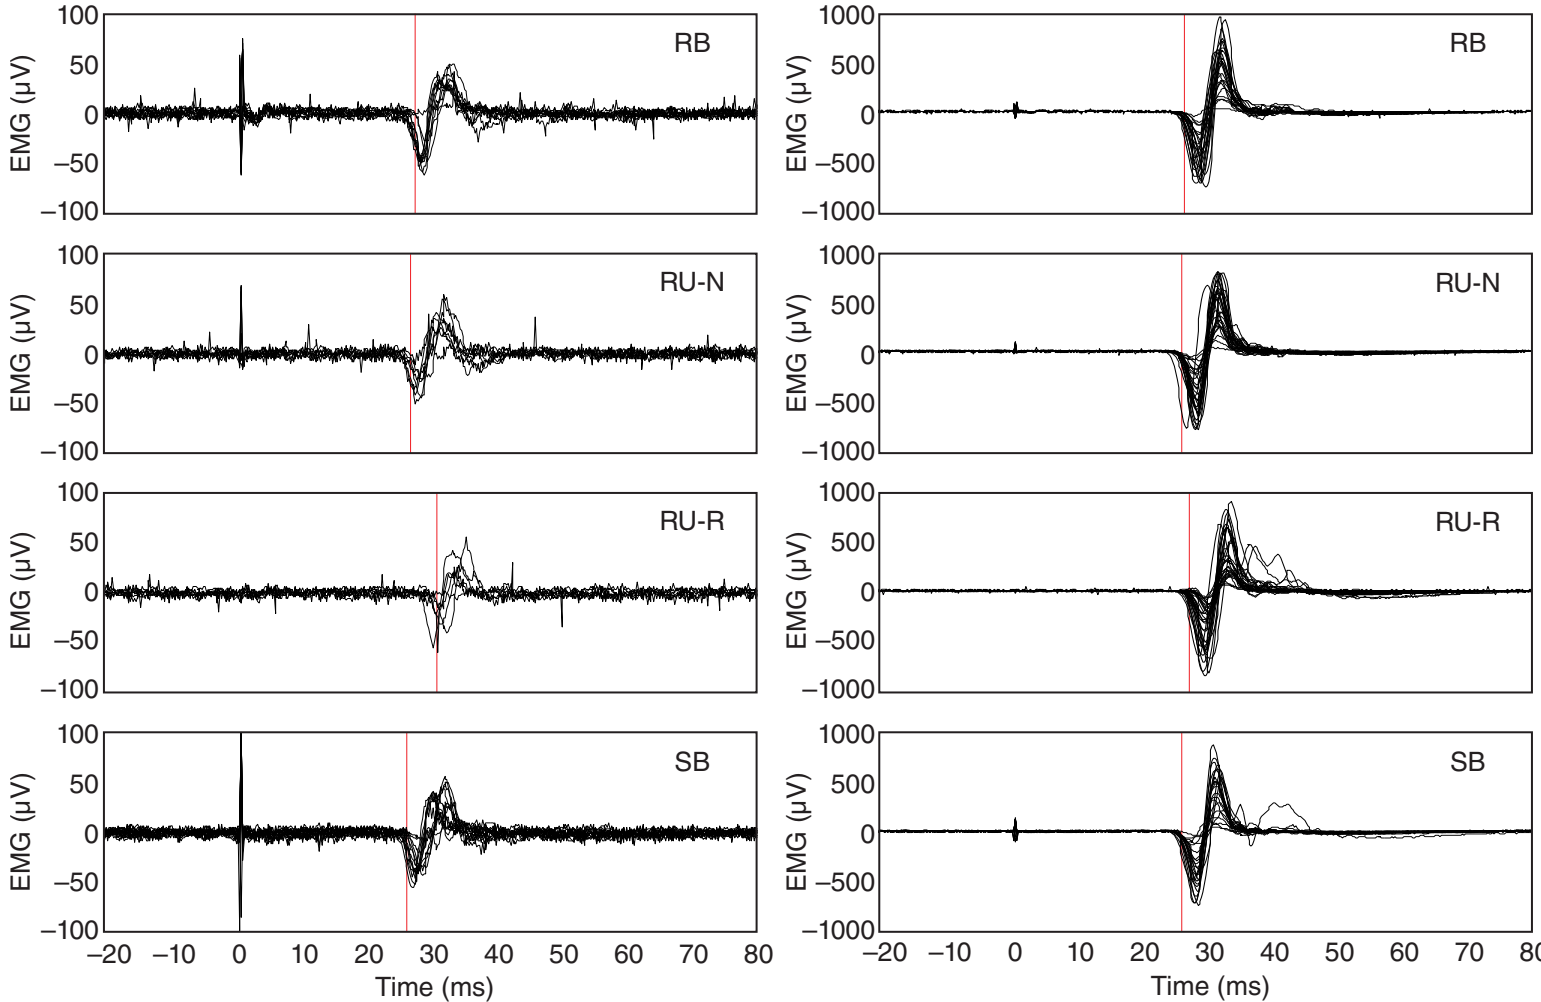

**Figure S1.** EMG recordings of one subject for the four rTMS pulse types (rows) and two stimulation amplitudes (columns) corresponding to the results in Figure 3(b) and (c), respectively. Average detected latency is indicated by vertical red line.
